# Supplementary material for: Benefits of Ion Mobility Separation in GC-APCI-HRMS Screening: From the Construction of a CCS Library to the Application to Real-World Samples
Source: PubMed Central journal article supplement (PMC9974067; doi:10.1021/acs.analchem.2c01118), 2022-06-13
Supplement: ac2c01118_si_001.pdf [file ac2c01118_si_001.pdf]

## Supplementary Material

### Benefits of ion mobility separation in GC-APCI-HRMS screening: from the construction of a CCS library to the application to real-world samples.

David Izquierdo-Sandoval<sup>1</sup>, David Fabregat-Safont<sup>1</sup>, Leticia Lacalle-Bergeron<sup>1</sup>, Juan Sancho<sup>1</sup>, Félix Hernández<sup>1</sup>, Tania Portoles<sup>1\*</sup>

<sup>1</sup>Environmental and Public Health Analytical Chemistry, Research Institute for Pesticides and Water (IUPA), University Jaume I, Av. Sos Baynat S/N, 12071, Castellón de la Plana, Spain.

\*Dr. Tania Portolés (ORCID: 0000-0002-8422-0822) E-mail. [tportole@uji.es](mailto:tportole@uji.es)

---

#### TABLE OF CONTENTS:

|                                                                                                                                                                                                                                                                                                                                                                               |             |
|-------------------------------------------------------------------------------------------------------------------------------------------------------------------------------------------------------------------------------------------------------------------------------------------------------------------------------------------------------------------------------|-------------|
| Title page.....                                                                                                                                                                                                                                                                                                                                                               | S-1, S-2    |
| Experimental section .....                                                                                                                                                                                                                                                                                                                                                    | S-3         |
| Chemical and Materials. ....                                                                                                                                                                                                                                                                                                                                                  | S-3         |
| Samples selected as case study .....                                                                                                                                                                                                                                                                                                                                          | S-3, S-4    |
| Table S1. Library for GC-APCI-IMS-HRMS in proton transfer conditions, including the compound name, CCS value, RSD(%) of the CCS, the family to which it belongs, the molecular formula and the five most representative fragments in HE. The suffix (_F) refers to the ion being an in-source fragment. LRI <sub>exp</sub> refers to experimental Linear Retention Index..... | S-5 - S-10  |
| Table S2. Library for GC-APCI-IMS-HRMS in charge transfer conditions, including the compound name, CCS value, RSD(%) of the CCS, the family to which it belongs, the molecular formula and the five most representative fragments in HE. The suffix (_F) refers to the ion being an in-source fragment. LRI <sub>exp</sub> refers to experimental Linear Retention Index..... | S-10 - S-14 |
| Table S3. Compounds showing CCS deviations between both ionic species [M+H] <sup>+</sup> and M <sup>++</sup> greater than 2%. ....                                                                                                                                                                                                                                            | S-15        |
| Table S4. Screening of multiclass pesticides in river water samples, fruits and vegetable.....                                                                                                                                                                                                                                                                                | S-16, S-17  |
| Figure S1. Average CCS value (n=6) and Relative Standard Deviation (RSD) for all ionic species (above) and for 50 randomly selected ion species, the “H” refers to [M+H] <sup>+</sup> whereas the absence of it refers to M <sup>++</sup> (bellow). In both graphs, ion species are ordered by means of average CCS values on the x-axis.....                                 | S-18        |
| Figure S2. Comparison of HRMS spectra for quintozone in analytical reference standard solution at 10 µg L <sup>-1</sup> (A), DT aligned data in fish feed sample spiked at 10 µg L <sup>-1</sup> (B) and non-DT aligned data of the same finding in the same                                                                                                                  |             |

|                                                                                                                                                                                                                                                                                                                                                        |      |
|--------------------------------------------------------------------------------------------------------------------------------------------------------------------------------------------------------------------------------------------------------------------------------------------------------------------------------------------------------|------|
| spiked fish feed sample (C). Low energy (LE) and high energy (HE) spectra are shown for both species $[M+H]^+$ and $M^{+\bullet}$ .....                                                                                                                                                                                                                | S-19 |
| Figure S3. Regression plot of the CCS values for protonated molecules from GC-APCI and LC-ESI. The blue circle surrounds cyanophos.....                                                                                                                                                                                                                | S-20 |
| Figure S4. Comparison of CCS values ( $\text{\AA}^2$ ) obtained by different IMS technologies for PAHs. $CCS^{DTIMS}$ were taken for the work of Zheng et al. <sup>5</sup> and $CCS^{TWIMS}$ from the library of the current work.....                                                                                                                 | S-20 |
| Figure S5. Identification of terbutometon in surface water. (A) Extracted-ion chromatogram (XIC) (mass window $\pm 0.01\text{Da}$ ) showing a positive finding in surface water. (B) Conventional LE (top) and HE (bottom) mass spectra without IMS drift time alignment. (C) LE (top) and HE (bottom) mass spectra with IMS drift time alignment..... | S-21 |
| Figure S6. Identification of metalaxyl in tomato. (A) XIC (mass window $\pm 0.01\text{Da}$ ) showing a positive finding in tomato. (B) Conventional LE (top) and HE (bottom) mass spectra without IMS drift time alignment. (C) LE (top) and HE (bottom) mass spectra with IMS drift time alignment.....                                               | S-22 |
| Figure S7. Identification of fludioxonil in orange. (A) XIC (mass window $\pm 0.01\text{Da}$ ) showing a positive finding in orange. (B) Conventional LE (top) and HE (bottom) mass spectra without IMS drift time alignment. (C) LE (top) and HE (bottom) mass spectra with IMS drift time alignment.....                                             | S-23 |
| References .....                                                                                                                                                                                                                                                                                                                                       | S-24 |

## EXPERIMENTAL SECTION

### Chemical and Materials.

A total of 264 reference standards, purchased from different vendors, including 18 PCBs, 14 brominated flame retardants (BFRs), 16 organophosphate flame retardants (OPFRs), 23 PAHs, 182 multi-class pesticides and 11 emerging pollutants included insect repellents, musks and UV-filters among others, were injected for the development of an in-house library for screening purposes in GC-APCI-IMS-QTOF. Reference standards of pesticides, PCBs and PAHs were purchased from Dr. Ehrenstorfer (Augsburg, Germany). PBDE standard mixtures were purchased from Chiron (Trondheim, Norway). Musk standards were purchased from LGC Standards (Barcelona, Spain), and UV filters and insect repellents from Sigma Aldrich (Madrid, Spain).

From solid reference standards, stock solutions (around 500  $\mu\text{g mL}^{-1}$ ) were prepared by dissolving the standard in acetone and stored in a freezer at  $-20\text{ }^{\circ}\text{C}$ . Different mixtures of reference standards of up to 15 compounds were prepared in hexane considering the substance classes, our previous knowledge about chromatographic separation, and avoiding the presence of isobaric and isomeric compounds in the same mixture. Mixtures at 10 and 100  $\mu\text{g L}^{-1}$  were injected in triplicate, and analysed in both charge-transfer and proton-transfer conditions in the APCI source. Acetone (residue analysis) and hexane (ultra-trace quality) were purchased from Scharlab (Barcelona, Spain). HPLC-grade water was obtained by purifying demineralised water in a Milli-Q Gradient A10 (Milli-pore, Bedford, MA, USA).

### Samples selected as case study

#### River water samples

Four surface water samples were collected in different sampling sites (one sample from each sampling site) placed in the lower section and the estuary of the Mijares river in Eastern Spain. The sampling points correspond to the sites 16, 17, 18 and 19 selected by Bijlsma, et al <sup>1</sup>. Samples were collected in polyethylene bottles, transported in refrigerated isothermal containers and stored in the dark at  $-20\text{ }^{\circ}\text{C}$  until their analysis.

Sample extraction and pre-concentration was made by solid-phase extraction (SPE). The procedure applied was based on the method previously developed by our research group <sup>1</sup>. Briefly, a volume of 250 mL of centrifuged water sample was passed through an Oasis HLB cartridge (150 mg, 6cc, Waters), previously conditioned and equilibrated, and then, the analytes were eluted with 5 mL of methanol. The extract was evaporated to dryness and reconstituted with 250  $\mu\text{L}$  of hexane. Quality control (QC) were included, consisted of three aliquots of a mixture of the four surface water samples in equal parts each one fortified at three concentration levels with 182 compounds (0.01, 0.1 and 1  $\mu\text{g L}^{-1}$ ) before the extraction.

### Fish feed sample

Briefly, 1 g of fish feed sample was weighted into a 15 mL Falcon tube and 2 mL of acetonitrile were added. After shaking for 30 s, 0.8 g of anhydrous magnesium sulfate were added and immediately shaken vigorously for 30 s. The tubes were centrifuged at 1893 rcf·g for 5 min and the upper layer of the extract was transferred to a 2 mL eppendorf tube and stored for at least two hours in a freezer to precipitate proteins and fix lipids to the tube walls (freezing cleanup). Then, 1 mL of the extract was carefully transferred to the cleanup QuEChERS vial (50 mg of PSA +150 mg of anhydrous magnesium sulfate +50 mg of C18), and it was vigorously shaken for 30 s and centrifuged at 12,557 rcf·g for 5 min. Then, 50 µL of the final acetonitrile extract was diluted with 300 µL of acetone and 650 µL of hexane in order to make the solution miscible (20-fold dilution factor). The extract was spiked at 10 and 50 µg L<sup>-1</sup> with 182 compounds for QC. More details in Portolés et al. <sup>2</sup>.

### Fruits and vegetables commodities

An acetate-buffered version of the QuEChERS method with some modifications was followed as the extraction procedure, as was applied in a previous study in our laboratory <sup>3</sup>. Briefly, 10 g of chopped and homogenized sample were weighed in a 50 mL Falcon conical tube and 10 mL 1% acetic acid in acetonitrile (v/v) were added. After shaking for 30 s, 1 g of anhydrous sodium acetate and 4 g of anhydrous magnesium sulfate were added and immediately shaken vigorously for 1 min. The tubes were centrifuged at 1893 rcf·g for 5 min and then 2 aliquots of the supernatant of 1 mL each, were transferred into separate d-SPE tubes containing 50 mg PSA, 150 mg anhydrous magnesium sulfate and 150 mg C18 for clean-up purposes and vortexed for 30 s. After centrifugation at 1150 rcf·g for 2 min, 500 µL of supernatant from each of the tubes were combined into an graduated evaporation tube, where it was evaporated under a gentle nitrogen stream at 50 °C to approximately 250 µL. The final volume was adjusted to 300 µL resulting in a final extract of 3.33 g matrix equivalent/mL. Apple and orange samples were fortified by addition of a mix solution of 182 compounds to 10 g portions of the homogenized materials at three levels (0.002, 0.01 and 0.05 mg kg<sup>-1</sup>), representing “high water content” and “high acid and high water content” matrices respectively as it is defined in SANTE/12682/2019 guideline <sup>4</sup>. These samples were used as Quality Control.

**Table S1. Library for GC-APCI-IMS-HRMS in proton transfer conditions, including the compound name, CCS value, RSD(%) of the CCS, the family to which it belongs, the molecular formula and the five most representative fragments in HE. The suffix (\_F) refers to the ion being an in-source fragment.  $LRI_{exp}$  refers to experimental Linear Retention Index.**

| Compound                 | CCS ( $\text{\AA}^2$ ) | RSD (%) | Family           | Formula         | $LRI_{exp}$ | F1        | F2        | F3         | F4        | F5        |
|--------------------------|------------------------|---------|------------------|-----------------|-------------|-----------|-----------|------------|-----------|-----------|
| DEET                     | 143.01                 | 0.08    | Insect repellent | C12H17NO        | 1562        | 119.04957 | 91.05503  | 72.04510   | 172.11329 |           |
| ambrettolide             | 160.94                 | 0.10    | Musk             | C16H28O2        | 1905        | 235.20536 | 217.19500 | 95.08633   | 81.07051  | 119.08572 |
| cashmeran                | 148.04                 | 0.08    | Musk             | C14H22O         | 1488        | 137.09631 | 189.16389 | 177.12744  | 133.10133 | 151.11179 |
| musk ketone              | 170.47                 | 0.08    | Musk             | C14H18N2O5      | 1931        | 232.13322 | 148.07529 | 174.09101  | 217.10900 | 190.08559 |
| musk xylene              | 168.06                 | 0.08    | Musk             | C12H15N3O6      | 1830        | 147.06578 | 118.06498 | 235.10658  | 264.09716 | 158.09629 |
| muskone                  | 161.17                 | 0.07    | Musk             | C16H30O         | 1826        | 213.16347 | 171.11659 | 95.08613   | 109.10147 | 183.11660 |
| tonalide                 | 168.29                 | 0.10    | Musk             | C18H26O         | 1836        | 175.11156 | 119.08545 | 133.010115 | 147.08020 | 161.09589 |
| traseolide               | 168.93                 | 0.09    | Musk             | C18H26O         | 1826        | 189.12786 | 147.08033 | 173.13324  | 129.06971 | 215.17994 |
| 4,4'dichlorobenzophenone | 150.42                 | 0.12    | Pesticides       | C13H8Cl2O       | 1960        | 139.99469 | 110.99991 | 75.02383   |           |           |
| alpha endosulfan         | 166.32                 | 0.19    | Pesticides       | C9H6Cl6O3S      | 2107        | 322.85173 | 286.87524 | 250.89824  | 216.93717 | 204.93704 |
| atrazine                 | 148.98                 | 0.44    | Pesticides       | C8H14ClN5       | 1740        | 174.05378 | 138.07749 | 132.03235  | 104.00160 | 96.05601  |
| atrazine desethyl        | 138.64                 | 0.24    | Pesticides       | C6H10ClN5       | 1655        | 146.02285 | 104.00167 | 68.02552   | 110.04696 | 83.06169  |
| atrazinedesisopropyl     | 132.00                 | 0.06    | Pesticides       | C5H8ClN5        | 1642        | 132.03257 | 68.02539  | 104.00200  | 146.02302 |           |
| azaconazole              | 160.93                 | 0.21    | Pesticides       | C12H11Cl2N3O2   | 2173        | 158.97643 | 230.99778 | 256.00413  | 82.04022  |           |
| aziphos ethyl            | 174.71                 | 0.49    | Pesticides       | C12H16N3O3PS2   | 2595        | 260.97930 | 232.94040 | 137.00552  | 132.04440 | 96.95132  |
| aziphos methyl_F         | 117.28                 | 0.10    | Pesticides       | C8H5NO          | 2513        | 105.03409 | 104.05045 | 77.03991   |           |           |
| azoxystrobin             | 194.46                 | 0.10    | Pesticides       | C22H17N3O5      | 3062        | 372.09750 | 344.10260 |            |           |           |
| beta endosulfan          | 164.93                 | 0.22    | Pesticides       | C9H6Cl6O3S      | 2229        | 322.85173 | 286.87524 | 250.89824  | 216.93717 | 204.93704 |
| bixafen                  | 181.57                 | 0.20    | Pesticides       | C18H12Cl2F3N3O  | 2835        | 159.03628 | 265.99328 | 374.02596  | 394.03127 | 338.48500 |
| bromophos ethyl          | 166.26                 | 0.08    | Pesticides       | C10H12BrCl2O3PS | 2066        | 338.82264 | 161.96340 | 177.94030  | 96.95101  | 258.85520 |
| bromophos methyl         | 157.19                 | 0.07    | Pesticides       | C8H8BrCl2O3PS   | 1963        | 334.82782 | 124.98226 | 109.00539  | 212.86894 | 240.86353 |
| bromuconazole I          | 168.34                 | 0.16    | Pesticides       | C13H12BrCl2N3O  | 2412        | 158.97572 | 172.95503 | 213.99321  | 192.0336  | 296.03536 |
| bromuconazole II         | 166.65                 | 0.21    | Pesticides       | C13H12BrCl2N3O  | 2420        | 158.97572 | 172.95503 | 208.99133  | 192.03341 |           |
| buprofezin               | 174.19                 | 0.09    | Pesticides       | C16H23N3OS      | 2187        | 250.10019 | 201.10568 | 145.04300  | 134.06022 | 106.06572 |
| cadusafos                | 157.61                 | 0.09    | Pesticides       | C10H23O2PS2     | 1676        | 130.9365  | 158.96994 | 96.95151   |           |           |
| captan_F                 | 145.34                 | 0.26    | Pesticides       | C9H7Cl2NO2S     | 2006        | 235.97040 | 179.94391 | 171.99834  | 155.90719 | 147.97187 |

| Compound             | CCS (Å <sup>2</sup> ) | RSD (%) | Family     | Formula         | LR <sub>exp</sub> | F1        | F2        | F3        | F4        | F5        |
|----------------------|-----------------------|---------|------------|-----------------|-------------------|-----------|-----------|-----------|-----------|-----------|
| carbofuran           | 147.99                | 0.09    | Pesticides | C12H15NO3       | 1736              | 123.04452 | 165.09122 |           |           |           |
| carbosulfan          | 190.66                | 0.13    | Pesticides | C20H32N2O3S     | 2429              | 160.11536 | 118.06856 | 128.14335 | 104.05330 | 76.02240  |
| chinomethionate      | 143.66                | 0.16    | Pesticides | C10H6N2OS2      | 2044              | 175.03176 | 207.00362 | 104.04921 | 121.01019 | 116.04916 |
| chlordecone          | 165.22                | 0.12    | Pesticides | C10Cl10O        | 2280              | 236.84065 | 218.87454 | 419.73837 | 454.70763 | 354.77640 |
| chlorfenapyr         | 177.74                | 0.17    | Pesticides | C15H11BrClF3N2O | 2200              | 271.02461 | 327.05091 | 378.96500 | 362.93316 | 282.01697 |
| chlorfenson          | 161.35                | 0.14    | Pesticides | C12H8Cl2O3S     | 2143              | 174.96160 | 126.99482 | 111.00014 |           |           |
| chlorfenvinfos       | 167.00                | 0.04    | Pesticides | C12H14Cl3O4P    | 2007              | 204.93763 | 169.96849 | 155.04698 | 127.0157  | 98.98499  |
| chlorothalonil       | 150.03                | 0.49    | Pesticides | C8Cl4N2         | 1781              | 229.91992 | 228.91221 | 132.97165 | 167.94034 | 193.94357 |
| chlorpyrifos ethyl   | 162.97                | 0.16    | Pesticides | C9H11Cl3NO3PS   | 1944              | 321.90236 | 293.87094 | 275.86063 | 197.9274  | 124.98218 |
| chlorpyrifos methyl  | 153.47                | 0.07    | Pesticides | C7H7Cl3NO3PS    | 1870              | 289.87606 | 124.98226 |           |           |           |
| clodinafop-propargyl | 179.85                | 0.12    | Pesticides | C17H13ClFNO4    | 2336              | 266.03792 | 238.00648 | 176.04995 | 129.98470 |           |
| coumaphos            | 179.62                | 0.07    | Pesticides | C14H16ClO5PS    | 2692              | 334.99013 | 306.95889 | 288.94835 | 226.99261 | 211.01546 |
| cyanazine            | 155.30                | 0.15    | Pesticides | C9H13ClN6       | 1954              | 214.08539 | 205.11981 | 132.03621 | 104.00176 | 83.06161  |
| cyanophos            | 154.25                | 0.09    | Pesticides | C9H10NO3PS      | 1769              | 211.92540 | 124.98229 | 109.00534 | 134.00588 | 150.03674 |
| cyfluthrin I         | 195.84                | 0.15    | Pesticides | C22H18Cl2FNO3   | 2753              | 226.06573 | 191.00154 | 163.00750 | 127.03120 | 91.05497  |
| cyfluthrin II        | 200.53                | 0.24    | Pesticides | C22H18Cl2FNO3   | 2768              | 226.06573 | 191.00154 | 163.00750 | 127.03120 | 91.05497  |
| cyfluthrin III       | 200.53                | 0.24    | Pesticides | C22H18Cl2FNO3   | 2773              | 226.06573 | 191.00154 | 163.00750 | 127.03120 | 91.05497  |
| cyfluthrin IV        | 200.44                | 0.24    | Pesticides | C22H18Cl2FNO3   | 2782              | 226.06573 | 191.00154 | 163.00750 | 127.03120 | 91.05497  |
| cypermethrin I       | 195.52                | 0.13    | Pesticides | C22H19Cl2NO3    | 2794              | 191.00154 | 163.00750 | 127.03120 | 91.05497  |           |
| cypermethrin II      | 199.97                | 0.35    | Pesticides | C22H19Cl2NO3    | 2811              | 191.00154 | 163.00750 | 127.03120 | 91.05497  |           |
| cypermethrin III     | 199.97                | 0.35    | Pesticides | C22H19Cl2NO3    | 2816              | 191.00154 | 163.00750 | 127.03120 | 91.05497  |           |
| cypermethrin IV      | 200.33                | 0.18    | Pesticides | C22H19Cl2NO3    | 2824              | 191.00154 | 163.00750 | 127.03120 | 91.05497  |           |
| cyproconazole        | 167.55                | 0.02    | Pesticides | C15H18ClN3O     | 2188              | 125.01545 | 70.04032  |           |           |           |
| cyprodinil           | 153.51                | 0.15    | Pesticides | C14H15N3        | 1987              | 210.10252 | 184.08674 | 167.0724  | 144.08053 | 119.06029 |
| deltamethrin         | 197.63                | 0.52    | Pesticides | C22H19Br2NO3    | 3037              | 278.90143 | 199.98364 | 171.98813 | 121.06502 |           |
| diazinon             | 169.05                | 0.20    | Pesticides | C12H21N2O3PS    | 1793              | 277.07634 | 266.99865 | 249.04494 | 169.07885 | 153.10168 |
| dichlofenthion       | 158.17                | 0.07    | Pesticides | C10H13Cl2O3PS   | 1854              | 258.91502 | 240.90461 | 178.94836 | 142.99009 | 96.95126  |
| dichloran            | 132.71                | 0.11    | Pesticides | C6H4Cl2N2O2     | 1711              | 189.96190 | 159.97116 | 123.99466 | 175.96606 | 147.97162 |
| dichlorvos           | 133.63                | 0.19    | Pesticides | C4H7Cl2O4P      | 1239              | 127.01581 | 109.00558 | 94.99080  | 78.99565  |           |
| dicrotophos          | 147.62                | 0.18    | Pesticides | C8H16NO5P       | 1659              | 127.01513 | 112.07627 | 72.04470  |           |           |

| Compound              | CCS (Å <sup>2</sup> ) | RSD (%) | Family     | Formula         | LR <sub>exp</sub> | F1        | F2        | F3        | F4        | F5        |
|-----------------------|-----------------------|---------|------------|-----------------|-------------------|-----------|-----------|-----------|-----------|-----------|
| dieldrin              | 157.92                | 0.31    | Pesticides | C12H8Cl6O       | 2163              | 324.89091 | 288.91427 | 289.92136 | 260.86009 | 253.94512 |
| difenoconazole        | 197.92                | 0.05    | Pesticides | C19H17Cl2N3O3   | 2974              | 251.00249 | 337.0393  | 188.03846 | 82.04000  |           |
| dimethachlor          | 151.73                | 0.17    | Pesticides | C13H18ClNO2     | 1852              | 224.08389 | 148.11221 | 132.08099 | 105.07076 | 174.09192 |
| dimethoate            | 140.17                | 0.09    | Pesticides | C5H12NO3PS2     | 1709              | 124.98206 |           |           |           |           |
| diphenylamine         | 136.33                | 0.07    | Pesticides | C12H11N         | 1619              | 152.06147 | 93.05766  | 92.05002  |           |           |
| endosulfan ether      | 152.53                | 0.20    | Pesticides | C9H6Cl6O        | 1834              | 286.87405 | 274.87524 | 250.89860 | 216.93710 | 204.93649 |
| endrin                | 163.84                | 0.23    | Pesticides | C12H8Cl6O       | 2194              | 314.90631 | 306.92433 | 278.92949 | 243.96029 | 242.95305 |
| EPN                   | 168.87                | 0.11    | Pesticides | C14H14NO4PS     | 2436              | 156.98723 | 296.01429 | 262.02654 | 141.01012 | 278.00434 |
| epoxiconazole         | 171.31                | 0.15    | Pesticides | C17H13ClFN3O    | 2381              | 121.04412 | 149.03981 | 101.03778 |           |           |
| ethalfluralin         | 165.31                | 0.16    | Pesticides | C13H14F3N3O4    | 1648              | 232.03260 | 276.05917 | 202.03452 | 186.03967 | 300.09556 |
| ethion                | 175.39                | 0.06    | Pesticides | C9H22O4P2S4     | 2263              | 199.00117 | 170.96971 | 142.93842 | 124.98226 | 96.95128  |
| ethoxyquin            | 154.63                | 0.14    | Pesticides | C14H19NO        | 1730              | 190.12215 | 148.07511 | 176.10579 | 162.09089 | 158.09597 |
| famphur               | 169.47                | 0.07    | Pesticides | C10H16NO5PS2    | 2295              | 217.00861 | 280.97009 | 124.98265 | 93.01101  | 184.98231 |
| fenarimol             | 174.30                | 0.24    | Pesticides | C17H12Cl2N2O    | 2585              | 304.02967 | 268.05259 | 259.00785 | 189.07033 | 138.99494 |
| fenhexamid            | 165.56                | 0.22    | Pesticides | C14H17Cl2NO2    | 2328              | 97.10228  | 143.01353 | 176.97466 | 266.09469 |           |
| fenitrothion          | 156.09                | 0.22    | Pesticides | C9H12NO5PS      | 1923              | 245.99831 | 213.97216 | 200.00497 | 168.98651 | 124.98207 |
| fenoxycarb            | 179.77                | 0.07    | Pesticides | C17H19NO4       | 2469              | 256.09638 | 88.03979  | 116.07064 | 70.03030  | 213.05435 |
| fenpropimorph         | 174.70                | 0.18    | Pesticides | C20H33NO        | 1952              | 147.11683 | 119.08575 | 130.12188 |           |           |
| fenthion              | 156.70                | 0.12    | Pesticides | C10H15O3PS2     | 1949              | 247.00119 | 169.01378 | 153.03666 | 138.04933 | 124.98202 |
| fipronil              | 180.21                | 0.12    | Pesticides | C12H4Cl2F6N4OS  | 1992              | 367.94952 | 254.96991 | 314.97083 | 289.97500 | 221.00841 |
| flumethrin            | 218.53                | 0.34    | Pesticides | C28H22Cl2FNO3   | 3086              |           |           |           |           |           |
| folpet_F              | 141.78                | 0.16    | Pesticides | C9H3Cl2NO2S     | 2011              | 116.90620 |           |           |           |           |
| ioxynil-octanoate     | 183.55                | 0.10    | Pesticides | C15H17I2NO2     | 2578              | 371.83809 | 244.93310 | 127.11205 |           |           |
| iprodione             | 178.96                | 0.13    | Pesticides | C13H13Cl2N3O3   | 2437              | 244.98814 | 216.99341 | 187.96661 | 173.98713 | 161.98741 |
| iprovalicarb          | 186.10                | 0.14    | Pesticides | C18H28N2O3      | 2174              | 119.08570 | 134.09610 | 91.05460  | 98.05923  |           |
| lambda cyhalothrin I  | 199.44                | 0.05    | Pesticides | C23H19ClF3NO3   | 2558              | 225.02889 | 197.03386 | 181.06469 | 161.05728 | 141.05115 |
| lambda cyhalothrin II | 199.50                | 0.09    | Pesticides | C23H19ClF3NO3   | 2591              | 225.02889 | 197.03386 | 181.06469 | 161.05728 | 141.05115 |
| leptophos             | 170.32                | 0.08    | Pesticides | C13H10BrCl2O2PS | 2511              | 171.00257 | 380.84858 | 155.02552 | 138.97645 | 124.03389 |
| malathion             | 165.89                | 0.16    | Pesticides | C10H19O6PS2     | 1935              | 285.00175 | 127.03925 | 124.98221 | 99.00808  |           |
| mepanipyrim           | 153.05                | 0.09    | Pesticides | C14H13N3        | 2120              | 182.08385 | 168.06383 | 131.06088 | 106.06565 | 143.0615  |

| Compound          | CCS (Å <sup>2</sup> ) | RSD (%) | Family     | Formula        | LR <sub>exp</sub> | F1        | F2        | F3        | F4        | F5        |
|-------------------|-----------------------|---------|------------|----------------|-------------------|-----------|-----------|-----------|-----------|-----------|
| mephosfolan       | 152.76                | 0.02    | Pesticides | C8H16NO3PS2    | 1993              | 139.95583 | 167.98752 | 196.01930 |           |           |
| metalaxyl         | 160.53                | 0.13    | Pesticides | C15H21NO4      | 1902              | 192.13842 | 160.11216 | 220.13347 | 148.11213 | 248.12802 |
| metconazole       | 167.70                | 0.17    | Pesticides | C17H22ClN3O    | 2467              | 125.01531 | 177.04673 | 233.10927 | 302.14172 | 70.04011  |
| methidathion      | 151.99                | 0.27    | Pesticides | C6H11N2O4PS3   | 2054              | 286.99215 | 145.00649 |           |           |           |
| methiocarb        | 152.26                | 0.06    | Pesticides | C11H15NO2S     | 1919              | 169.06785 | 153.03684 | 121.06501 | 107.04951 | 91.05492  |
| methoxychlor_F    | 139.04                | 0.21    | Pesticides | C9H7Cl3O       | 2455              | 201.99465 | 186.9711  | 167.02564 | 158.97617 | 132.05683 |
| metolachlor       | 159.29                | 0.07    | Pesticides | C15H22ClNO2    | 1939              | 252.11518 | 176.14328 | 160.11182 | 146.09634 | 134.09626 |
| metrafenone       | 181.75                | 0.10    | Pesticides | C19H21BrO5     | 2595              | 209.08085 | 228.96841 | 166.06194 | 194.05732 |           |
| metribuzin        | 147.10                | 0.15    | Pesticides | C8H14N4OS      | 1872              | 187.10103 | 171.05877 | 145.054   | 114.99669 | 89.01735  |
| molinate          | 138.41                | 0.23    | Pesticides | C9H17NOS       | 1536              | 126.09151 | 98.09698  | 83.08638  | 55.05520  | 160.11556 |
| omethoate         | 135.20                | 0.08    | Pesticides | C5H12NO4PS     | 1583              | 124.98238 | 109.00588 | 154.99284 | 182.9876  | 196.01964 |
| oxadixyl          | 157.69                | 0.21    | Pesticides | C14H18N2O4     | 2251              | 219.11293 | 191.09378 | 133.08780 | 132.08093 |           |
| parathion ethyl   | 159.64                | 0.08    | Pesticides | C10H14NO5PS    | 1954              | 235.97786 | 217.96721 | 189.98479 | 171.97424 | 156.01057 |
| parathion methyl  | 150.10                | 0.14    | Pesticides | C8H10NO5PS     | 1882              | 231.98286 | 199.95682 | 185.99004 | 154.97146 | 109.00547 |
| pendimethalin     | 159.89                | 0.17    | Pesticides | C13H19N3O4     | 1986              | 264.13449 | 236.10299 | 230.12883 | 212.0667  | 201.13835 |
| permethrin I_F    | 185.49                | 0.08    | Pesticides | C21H19ClO3     | 2675              | 337.09854 | 319.13264 | 301.12216 | 273.1276  | 255.05729 |
| permethrin II_F   | 187.37                | 0.11    | Pesticides | C21H19ClO3     | 2693              | 319.13241 | 279.09879 | 275.14274 | 261.09083 | 255.05773 |
| phorate           | 149.05                | 0.26    | Pesticides | C7H17O2PS3     | 1687              | 170.96958 | 142.93850 | 124.98207 | 96.95130  | 75.02709  |
| phosmet           | 158.56                | 0.15    | Pesticides | C11H12NO4PS2   | 2434              | 160.03923 | 133.02847 |           |           |           |
| phosphamidon      | 156.16                | 0.13    | Pesticides | C10H19ClNO5P   | 1853              | 226.98729 | 127.0156  | 174.06796 | 100.07610 | 109.00612 |
| pirimicarb        | 153.29                | 0.11    | Pesticides | C11H18N4O2     | 1837              | 182.12872 | 166.09761 | 150.10267 | 137.07102 | 72.04524  |
| pirimiphos methyl | 165.36                | 0.07    | Pesticides | C11H20N3O3PS   | 1924              | 164.11820 | 151.02665 | 136.08693 | 124.98232 | 108.05598 |
| procymidone       | 159.64                | 0.08    | Pesticides | C13H11Cl2NO2   | 2033              | 256.02909 | 238.01871 | 228.03435 | 212.00276 | 185.98717 |
| profenofos        | 166.61                | 0.13    | Pesticides | C11H15BrClO3PS | 2152              | 304.86197 | 187.96964 | 266.88772 | 128.00300 | 143.97956 |
| propachlor        | 143.12                | 0.05    | Pesticides | C11H14ClNO     | 1594              | 170.03715 | 106.06630 | 152.02651 | 134.06087 | 94.06632  |
| propazine         | 155.64                | 0.21    | Pesticides | C9H16ClN5      | 1744              | 188.06975 | 146.02294 | 104.00143 | 68.02346  |           |
| propiconazole     | 176.88                | 0.05    | Pesticides | C15H17Cl2N3O2  | 2326              | 158.97628 | 256.00408 | 186.97158 | 172.95563 | 69.07073  |
| propoxur_F        | 130.31                | 0.12    | Pesticides | C8H9NO3        | 1606              | 111.04393 | 93.03390  | 65.03940  |           |           |
| propyzamide       | 157.63                | 0.18    | Pesticides | C12H11Cl2NO    | 1779              | 189.98201 | 172.95549 |           |           |           |
| prosulfocarb      | 158.24                | 0.06    | Pesticides | C14H21NOS      | 1907              | 91.05489  | 128.10706 |           |           |           |



| Compound                | CCS (Å <sup>2</sup> ) | RSD (%) | Family     | Formula        | LR <sub>exp</sub> | F1        | F2        | F3        | F4        | F5        |
|-------------------------|-----------------------|---------|------------|----------------|-------------------|-----------|-----------|-----------|-----------|-----------|
| pyriproxyfen            | 183.91                | 0.10    | Pesticides | C20H19NO3      | 2544              | 227.10671 | 185.05975 | 96.04509  | 78.03474  |           |
| quinalphos              | 162.45                | 0.05    | Pesticides | C12H15N2O3PS   | 2025              | 271.03011 | 242.99874 | 224.98827 | 156.06786 | 147.05543 |
| quintozene              | 146.24                | 0.35    | Pesticides | C6Cl5NO2       | 1723              | 248.84089 | 264.84410 | 213.87178 | 176.90561 |           |
| simazine                | 142.39                | 0.22    | Pesticides | C7H12ClN5      | 1738              | 174.05412 | 166.10864 | 132.03268 | 124.08702 | 104.00157 |
| tau-fluvalinate I       | 218.12                | 0.07    | Pesticides | C26H22ClF3N2O3 | 2940              | 250.06023 | 208.07570 | 181.06483 |           |           |
| tau-fluvalinate II      | 217.44                | 0.15    | Pesticides | C26H22ClF3N2O3 | 2953              | 250.06023 | 208.07570 | 181.06483 |           |           |
| tebuconazole            | 166.25                | 0.03    | Pesticides | C16H22ClN3O    | 2349              | 290.14194 | 125.01549 | 165.04650 | 103.05385 | 70.04010  |
| terbufos_F              | 136.16                | 0.21    | Pesticides | C5H11O2PS3     | 1763              | 128.92271 | 174.91020 | 156.95041 | 184.98643 | 96.95120  |
| tefluthrin              | 176.40                | 0.07    | Pesticides | C17H14ClF7O2   | 1828              | 325.04634 | 177.03218 | 127.03543 |           |           |
| terbumeton              | 156.15                | 0.05    | Pesticides | C10H19N5O      | 1760              | 170.10340 | 142.07230 | 100.05086 | 114.06611 | 128.08190 |
| terbumetondesethyl      | 145.32                | 0.23    | Pesticides | C8H15N5O       | 1652              | 142.07282 | 100.05151 | 86.03614  |           |           |
| terbuthylazine          | 154.17                | 0.08    | Pesticides | C9H16ClN5      | 1774              | 174.05414 | 146.02290 | 138.07747 | 132.03244 | 104.00165 |
| terbuthylazine desethyl | 143.80                | 0.12    | Pesticides | C7H12ClN5      | 1665              | 146.02315 | 104.00187 | 68.02547  | 79.00682  |           |
| terbutryn               | 160.25                | 0.14    | Pesticides | C10H19N5S      | 1919              | 186.08063 | 158.04943 | 170.04913 | 138.07732 | 116.02786 |
| tetradifon              | 165.97                | 0.33    | Pesticides | C12H6Cl4O2S    | 2504              | 242.88364 | 194.91667 | 178.92168 | 174.96148 | 158.96665 |
| thiabendazole           | 136.58                | 0.01    | Pesticides | C10H7N3S       | 1988              | 175.03154 | 131.06003 |           |           |           |
| tolclofos-methyl        | 150.20                | 0.11    | Pesticides | C9H11Cl2O3PS   | 1875              | 268.93488 | 174.97074 | 124.98183 | 253.91120 | 109.00707 |
| tolyfluanid_F           | 139.44                | 0.14    | Pesticides | C8H6Cl2FNS     | 1990              | 213.06956 | 137.02959 | 91.05505  |           |           |
| triadimefon             | 172.25                | 0.07    | Pesticides | C14H16ClN3O2   | 1953              | 197.07282 | 225.06761 | 141.01038 | 155.02605 | 111.00052 |
| triflumizole            | 174.71                | 0.19    | Pesticides | C15H15ClF3N3O  | 2046              | 355.06924 | 346.09181 | 326.96558 | 278.05500 | 266.02627 |
| trifluralin             | 168.43                | 0.18    | Pesticides | C13H16F3N3O4   | 1673              | 290.07464 | 260.06415 | 248.02774 | 232.03287 | 214.07138 |
| vinclozolin             | 162.10                | 0.18    | Pesticides | C12H9Cl2NO3    | 1881              | 242.01333 | 214.00074 | 178.04184 | 171.97149 | 164.02603 |
| T2IPPP                  | 204.49                | 0.14    | OPFRs      | C27H33O4P      | 2723              | 411.17195 | 369.12477 | 327.07818 | 293.09291 | 234.0395  |
| T35DMPP                 | 203.66                | 0.05    | OPFRs      | C24H27O4P      | 2857              | 307.10912 | 289.09886 | 271.08815 | 194.10859 | 179.08541 |
| TBEP                    | 198.71                | 0.08    | OPFRs      | C18H39O7P      | 2392              | 343.18897 | 299.16203 | 243.09889 | 225.08866 | 199.07320 |
| TBPP                    | 239.81                | 0.12    | OPFRs      | C30H39O4P      | 3349              | 439.20317 | 383.14054 |           |           |           |
| TCEP                    | 149.21                | 0.07    | OPFRs      | C6H12Cl3O4P    | 1748              | 222.96903 | 186.99274 | 160.97639 | 125.00000 | 98.98458  |
| TCPP                    | 160.42                | 0.18    | OPFRs      | C9H18Cl3O4P    | 1778              | 251.0008  | 174.99235 | 139.01579 | 98.98458  |           |
| TDBPP                   | 188.91                | 0.09    | OPFRs      | C9H15Br6O4P    | 3005              | 498.71573 | 298.85016 | 200.87328 | 136.99991 | 118.94958 |
| TDCPP                   | 170.49                | 0.02    | OPFRs      | C9H15Cl6O4P    | 2292              | 320.91926 | 208.95312 | 284.94313 | 172.97640 | 137.00009 |

| Compound    | CCS (Å <sup>2</sup> ) | RSD (%) | Family     | Formula   | LRI <sub>exp</sub> | F1        | F2        | F3        | F4        | F5        |
|-------------|-----------------------|---------|------------|-----------|--------------------|-----------|-----------|-----------|-----------|-----------|
| TEHP        | 221.61                | 0.09    | OPFRs      | C24H51O4P | 2443               | 352.22481 | 240.09958 | 225.09011 | 127.97457 | 98.98471  |
| TMP         | 187.69                | 0.08    | OPFRs      | C21H21O4P | 2617               | 279.07788 | 261.06731 | 243.05677 | 196.08793 | 165.06981 |
| TNBP        | 167.05                | 0.12    | OPFRs      | C12H27O4P | 1637               | 211.10918 | 184.03677 | 155.04686 | 98.98471  |           |
| TOTP        | 180.58                | 0.06    | OPFRs      | C21H21O4P | 2543               | 277.06208 | 165.07009 | 179.08541 | 261.06743 | 243.05692 |
| TPP         | 170.49                | 0.09    | OPFRs      | C18H15O4P | 2366               | 309.06842 | 251.04673 | 233.03626 | 215.02574 | 152.06193 |
| TPRP        | 149.05                | 0.07    | OPFRs      | C9H21O4P  | 1372               | 139.01594 | 98.98466  | 80.97441  |           |           |
| TPTP        | 188.78                | 0.09    | OPFRs      | C21H21O4P | 2709               | 279.07852 | 261.06750 | 243.06750 | 198.10334 | 166.07719 |
| octocrylene | 193.47                | 0.08    | UV-filters | C24H27NO2 | 2623               | 232.07594 | 204.08072 | 250.08632 | 177.06910 | 105.03433 |

**Table S2. Library for GC-APCI-IMS-HRMS in charge transfer conditions, including the compound name, CCS value, RSD(%) of the CCS, the family to which it belongs, the molecular formula and the five most representative fragments in HE. The suffix (\_F) refers to the ion being an in-source fragment. LRI<sub>exp</sub> refers to experimental Linear Retention Index.**

| Compound     | CCS (Å <sup>2</sup> ) | RSD (%) | Family     | Formula    | LRI <sub>exp</sub> | F1        | F2        | F3        | F4        | F5        |
|--------------|-----------------------|---------|------------|------------|--------------------|-----------|-----------|-----------|-----------|-----------|
| BDE 28       | 156.47                | 0.30    | BFRs       | C12H7Br3O  | 2245               | 327.89151 | 298.88925 | 245.96748 | 247.96555 | 168.05620 |
| BDE 47       | 162.52                | 0.14    | BFRs       | C12H6Br4O  | 2492               | 405.80205 | 325.87697 | 245.96732 | 216.96507 | 296.87534 |
| BDE 66       | 163.88                | 0.07    | BFRs       | C12H6Br4O  | 2537               | 405.80119 | 325.87660 | 245.96758 | 216.96469 | 234.85795 |
| BDE 85       | 168.69                | 0.18    | BFRs       | C12H5Br5O  | 2865               | 485.71048 | 403.78709 | 325.87608 | 296.87384 | 250.85322 |
| BDE 99       | 170.49                | 0.37    | BFRs       | C12H5Br5O  | 2757               | 485.71084 | 403.78753 | 325.87627 | 250.85332 | 296.87383 |
| BDE 100      | 168.11                | 0.07    | BFRs       | C12H5Br5O  | 2690               | 485.70749 | 483.70984 | 403.78736 | 325.87656 | 296.87408 |
| BDE 153      | 177.57                | 0.13    | BFRs       | C12H4Br6O  | 3015               | 563.61901 | 483.69607 | 403.78765 | 330.76248 |           |
| BDE 154      | 175.19                | 0.17    | BFRs       | C12H4Br6O  | 2921               | 563.61974 | 483.69588 | 405.78469 | 330.76137 |           |
| BDE 183      | 180.63                | 0.08    | BFRs       | C12H3Br7O  | 3274               | 643.52930 | 561.60649 | 483.69606 | 408.67247 |           |
| BDE 184      | 177.00                | 0.11    | BFRs       | C12H3Br7O  | 3220               | 643.52968 | 561.60652 | 483.69508 | 408.67240 |           |
| BDE 191      | 182.75                | 0.09    | BFRs       | C12H3Br7O  | 3349               | 643.52839 | 561.60655 | 483.69508 | 408.67240 |           |
| BDE 196      | 186.85                | 0.15    | BFRs       | C12H2Br8O  | 3634               | 721.43697 | 641.51371 | 561.60566 | 408.67240 |           |
| BDE 197      | 182.94                | 0.15    | BFRs       | C12H2Br8O  | 3564               | 721.44115 | 641.51458 | 563.60348 | 408.67374 |           |
| BTBPE        | 182.34                | 0.18    | BFRs       | C14H8Br6O2 | 3353               | 356.79509 | 277.87657 | 330.78061 | 249.88212 | 196.95969 |
| ehmc         | 183.43                | 0.02    | UV-filters | C18H26O3   | 2316               | 178.06234 | 161.05972 | 132.05707 | 117.03376 | 77.03911  |
| galaxolide_F | 161.01                | 0.24    | Musk       | C17H22O    | 1840               | 213.16364 | 171.11590 | 143.08472 | 198.13981 | 129.06891 |

| Compound               | CCS (Å <sup>2</sup> ) | RSD (%) | Family | Formula  | LRI <sub>exp</sub> | F1        | F2        | F3        | F4        | F5        |
|------------------------|-----------------------|---------|--------|----------|--------------------|-----------|-----------|-----------|-----------|-----------|
| 5-methylchrysene       | 149.18                | 0.08    | PAHs   | C19H14   | 2573               | 215.08560 | 228.09324 | 202.07749 | 165.07019 |           |
| acenaphthene           | 127.67                | 0.14    | PAHs   | C12H10   | 1449               | 127.05434 | 115.05433 | 141.06998 | 77.03884  | 102.04668 |
| acenaphthylene         | 125.25                | 0.21    | PAHs   | C12H8    | 1449               | 139.05398 | 126.04607 | 102.04620 | 78.04592  | 89.03842  |
| anthracene             | 131.03                | 0.06    | PAHs   | C14H10   | 1785               | 165.07004 | 152.06198 | 128.06211 | 115.05462 | 139.05469 |
| benzo(a)anthracene     | 144.42                | 0.12    | PAHs   | C18H12   | 2430               | 215.08580 | 202.07793 | 189.06970 | 178.07755 |           |
| benzo(a)pyrene         | 148.43                | 0.10    | PAHs   | C20H12   | 2821               | 239.08560 | 226.07726 | 202.07763 | 189.07035 |           |
| benzo(b)fluoranthene   | 149.83                | 0.04    | PAHs   | C20H12   | 2736               | 226.07777 | 239.08571 | 202.07773 | 215.08502 |           |
| benzo(c)fluorene       | 141.98                | 0.07    | PAHs   | C17H12   | 2213               | 202.07769 | 189.06978 | 165.07008 |           |           |
| benzo(gh)perylene      | 153.08                | 0.13    | PAHs   | C22H12   | 3191               | 263.08600 | 250.07825 |           |           |           |
| benzo(k)fluoranthene   | 150.80                | 0.03    | PAHs   | C20H12   | 2745               | 239.08568 | 226.07780 | 202.07785 | 213.07063 | 189.07100 |
| benzo[j]fluoranthene   | 149.99                | 0.11    | PAHs   | C20H12   | 2740               | 226.07744 | 239.08514 | 202.07707 |           |           |
| chrysene               | 143.58                | 0.16    | PAHs   | C18H12   | 2440               | 202.07750 | 192.98082 | 215.08585 | 189.07001 | 152.06160 |
| dibenzo(a,h)anthracene | 158.92                | 0.09    | PAHs   | C22H14   | 3146               |           |           |           |           |           |
| dibenzo[a,e]pyrene     | 160.98                | 0.03    | PAHs   | C24H14   | 3569               |           |           |           |           |           |
| dibenzo[a,h]pyrene     | 161.28                | 0.12    | PAHs   | C24H14   | 3597               |           |           |           |           |           |
| dibenzo[a,i]pyrene     | 161.12                | 0.16    | PAHs   | C24H14   | 3600               |           |           |           |           |           |
| dibenzo[a,l]pyrene     | 163.27                | 0.18    | PAHs   | C24H14   | 3496               | 289.10142 | 276.09330 |           |           |           |
| fluoranthene           | 136.79                | 0.08    | PAHs   | C16H10   | 1996               | 189.07017 | 152.06220 | 176.06235 | 163.05452 | 128.06231 |
| fluorene               | 129.33                | 0.17    | PAHs   | C13H10   | 1580               | 152.06220 | 139.05433 | 115.04560 | 89.03939  | 128.06234 |
| indeno(123cd)pyrene    | 155.22                | 0.10    | PAHs   | C22H12   | 3129               | 263.08588 | 250.07724 | 239.08427 |           |           |
| naphthalene            | 120.30                | 0.24    | PAHs   | C10H8    | 1195               | 102.04582 | 78.04583  |           |           |           |
| phenanthrene           | 130.74                | 0.15    | PAHs   | C14H10   | 1774               | 152.06148 | 165.06940 | 128.06160 | 139.05402 | 115.05398 |
| pyrene                 | 136.00                | 0.07    | PAHs   | C16H10   | 2097               | 189.06993 | 176.06152 | 152.06134 | 163.05408 |           |
| PCB 28                 | 144.79                | 0.28    | PCBs   | C12H7Cl3 | 1867               | 186.02336 | 220.99200 | 151.05419 |           |           |
| PCB 52                 | 151.98                | 0.19    | PCBs   | C12H6Cl4 | 1923               | 219.98414 | 254.95303 | 185.01489 | 150.04617 |           |
| PCB 77                 | 152.09                | 0.24    | PCBs   | C12H6Cl4 | 2160               | 219.98414 | 232.02420 | 257.95629 | 185.01479 | 150.04619 |
| PCB 81                 | 152.65                | 0.20    | PCBs   | C12H6Cl4 | 2181               | 219.98421 | 233.97835 | 255.96095 | 185.01481 | 150.04661 |
| PCB 101                | 157.62                | 0.27    | PCBs   | C12H5Cl5 | 2106               | 253.94549 | 290.91151 | 218.97687 | 184.00687 |           |
| PCB 105                | 157.88                | 0.17    | PCBs   | C12H5Cl5 | 2225               | 253.94573 | 290.91174 | 267.98286 | 218.97635 | 184.00748 |
| PCB 114                | 156.35                | 0.15    | PCBs   | C12H5Cl5 | 2252               | 253.94511 | 267.98268 | 290.91150 | 218.97588 | 184.00715 |

| Compound            | CCS ( $\text{\AA}^2$ ) | RSD (%) | Family     | Formula         | LRI <sub>exp</sub> | F1        | F2        | F3        | F4        | F5        |
|---------------------|------------------------|---------|------------|-----------------|--------------------|-----------|-----------|-----------|-----------|-----------|
| PCB 118             | 158.16                 | 0.18    | PCBs       | C12H5Cl5        | 2233               | 253.94569 | 290.91164 | 218.96610 | 184.00708 |           |
| PCB 123             | 156.79                 | 0.14    | PCBs       | C12H5Cl5        | 2284               | 253.94535 | 265.98512 | 292.90979 | 218.97608 | 184.00797 |
| PCB 126             | 158.96                 | 0.10    | PCBs       | C12H5Cl5        | 2357               | 253.94537 | 265.98590 | 291.91805 | 218.97662 | 184.00787 |
| PCB 138             | 162.22                 | 0.26    | PCBs       | C12H4Cl6        | 2334               | 289.90365 | 324.87264 | 254.93508 | 217.96920 |           |
| PCB 153             | 163.51                 | 0.21    | PCBs       | C12H4Cl6        | 2279               | 289.90356 | 324.87222 | 253.64548 | 217.96814 |           |
| PCB 156             | 164.54                 | 0.19    | PCBs       | C12H4Cl6        | 2398               | 289.90355 | 301.94351 | 324.87233 | 253.94491 |           |
| PCB 157             | 163.07                 | 0.13    | PCBs       | C12H4Cl6        | 2445               | 289.90351 | 301.94400 | 324.87226 | 254.93536 |           |
| PCB 167             | 162.83                 | 0.12    | PCBs       | C12H4Cl6        | 2455               | 289.90356 | 301.94355 | 324.87250 | 253.94511 | 217.96802 |
| PCB 169             | 165.60                 | 0.13    | PCBs       | C12H4Cl6        | 2531               | 289.90328 | 301.94327 | 325.87802 | 255.94005 |           |
| PCB 180             | 168.12                 | 0.25    | PCBs       | C12H3Cl7        | 2482               | 323.86454 | 358.83354 | 289.90218 |           |           |
| PCB 189             | 169.25                 | 0.13    | PCBs       | C12H3Cl7        | 2612               | 323.86474 | 335.90461 | 358.83449 | 289.90460 |           |
| 2-phenylphenol      | 130.74                 | 0.10    | Pesticides | C12H10O         | 1514               | 152.06191 | 141.06998 | 141.06998 | 115.05454 | 77.03938  |
| acequinocyl_F       | 196.61                 | 0.14    | Pesticides | C22H30O3        | 2854               | 323.20017 | 215.03339 | 203.10762 |           |           |
| alachlor            | 155.59                 | 0.14    | Pesticides | C14H20ClNO2     | 1887               | 188.10659 | 172.11187 | 160.11178 | 131.07217 |           |
| aldrin              | 161.65                 | 0.94    | Pesticides | C12H8Cl6        | 1936               | 247.85165 | 213.89023 |           |           |           |
| bifenthrin_F        | 137.00                 | 0.24    | Pesticides | C14H12          | 2464               | 166.07640 |           |           |           |           |
| bromopropylate_F    | 154.65                 | 0.49    | Pesticides | C13H8Br2O       | 2451               | 184.94194 | 154.94921 |           |           |           |
| captafol            | 158.09                 | 0.07    | Pesticides | C10H9Cl4NO2S    | 2376               | 160.87801 | 275.96480 | 311.94104 | 148.03926 | 107.04961 |
| carbophenothion     | 169.85                 | 0.07    | Pesticides | C11H16ClO2PS3   | 2314               | 156.98731 | 142.93870 | 170.96967 | 199.00132 | 124.98222 |
| carfentrazone ethyl | 183.89                 | 0.13    | Pesticides | C15H14Cl2F3N3O3 | 2321               | 312.05904 | 340.09041 | 330.02511 | 976.06690 | 240.99777 |
| chlorpropham        | 145.61                 | 0.61    | Pesticides | C10H12ClNO2     | 1658               | 171.00809 | 127.01836 |           |           |           |
| DDD_F               | 144.47                 | 0.29    | Pesticides | C13H8Cl2        | 2253               | 199.03052 | 165.06924 |           |           |           |
| DDE                 | 161.83                 | 0.06    | Pesticides | C14H8Cl4        | 2166               | 280.96878 | 245.99920 | 210.02300 |           |           |
| DDT_F               | 144.84                 | 0.11    | Pesticides | C13H8Cl2        | 2335               | 199.03051 | 164.06122 |           |           |           |
| deltamethrin        | 194.82                 | 0.20    | Pesticides | C22H19Br2NO3    | 3037               | 397.04220 | 344.12784 | 278.90061 | 250.90668 | 208.07503 |
| dicofol_F           | 150.52                 | 0.01    | Pesticides | C13H8Cl2O       | 2466               | 138.99394 | 110.99939 |           |           |           |
| difenoconazole_F    | 173.40                 | 0.03    | Pesticides | C16H12Cl2O3     | 2995               | 264.98190 | 202.01794 | 173.01531 | 209.00910 |           |
| diflufenican        | 183.86                 | 0.07    | Pesticides | C19H11F5N2O2    | 2389               | 266.04230 | 246.03589 | 238.04706 | 375.07444 |           |
| dioxathion_F        | 147.24                 | 0.13    | Pesticides | C8H15O4PS2      | 1758               | 140.97660 | 169.00802 | 197.03938 | 96.95089  | 242.99170 |
| endosulfan sulfate  | 156.41                 | 0.34    | Pesticides | C9H6Cl6O4S      | 2313               | 384.84320 | 286.87540 | 269.81311 | 256.90852 | 250.89866 |

| Compound               | CCS (Å <sup>2</sup> ) | RSD (%) | Family     | Formula          | LRI <sub>exp</sub> | F1        | F2        | F3        | F4        | F5        |
|------------------------|-----------------------|---------|------------|------------------|--------------------|-----------|-----------|-----------|-----------|-----------|
| etofenprox             | 189.39                | 0.15    | Pesticides | C25H28O3         | 2850               | 183.08031 | 163.11147 | 135.08012 | 107.04888 |           |
| fenamiphos             | 170.80                | 0.26    | Pesticides | C13H22NO3PS      | 2145               | 217.00767 | 260.05020 | 288.08161 | 154.04371 | 234.03425 |
| fenvalerate I          | 195.56                | 0.20    | Pesticides | C25H22ClNO3      | 2928               | 225.07872 | 167.06223 | 125.01518 |           |           |
| fenvalerate II         | 195.42                | 0.18    | Pesticides | C25H22ClNO3      | 2959               | 225.07872 | 167.06223 | 125.01518 |           |           |
| flucythrinate          | 200.93                | 0.10    | Pesticides | C26H22NO4        | 2834               | 199.09275 | 157.04589 | 225.07810 | 184.03291 | 107.04973 |
| fludioxonil            | 147.68                | 0.03    | Pesticides | C12H6F2N2O2      | 2152               | 182.04667 | 127.04094 | 154.05190 | 101.03777 |           |
| fluquinconazole_F      | 177.57                | 0.20    | Pesticides | C16H9Cl2FN4O     | 2671               | 226.99251 | 210.00777 | 306.96011 | 109.00452 | 306.96011 |
| heptachlor             | 155.14                | 0.27    | Pesticides | C10H5Cl7         | 1888               | 334.85176 | 263.90689 | 229.94573 | 229.94573 | 134.97719 |
| heptachlor epoxide a   | 157.61                | 0.49    | Pesticides | C10H5Cl7O        | 1993               | 253.90250 | 288.87203 | 182.91690 | 352.84630 | 316.86687 |
| heptachlor epoxide b_F | 155.39                | 0.05    | Pesticides | C10H4Cl6O        | 1988               | 252.89561 | 216.93737 | 262.85632 | 281.89810 | 299.86389 |
| hexachlorobenzene      | 134.68                | 0.22    | Pesticides | C6Cl6            | 1688               | 246.84414 | 211.87514 | 176.90622 |           |           |
| hexachlorobutadiene    | 131.11                | 0.12    | Pesticides | C4Cl6            | 1218               | 189.87158 | 224.84051 | 140.90579 | 154.90283 | 117.93706 |
| indoxacarb             | 214.92                | 0.22    | Pesticides | C22H17ClF3N3O7   | 3030               | 264.02972 | 218.04231 | 203.01879 | 176.00239 | 235.04492 |
| isodrin                | 153.87                | 0.29    | Pesticides | C12H8Cl6         | 1973               | 326.90621 | 290.92993 | 192.93788 |           |           |
| isopyrazam             | 181.90                | 0.16    | Pesticides | C20H23F2N3O      | 2626               | 159.03643 | 303.11719 | 344.15652 | 262.09729 | 276.11283 |
| mirex_F                | 132.83                | 0.15    | Pesticides | C5Cl6            | 2551               | 234.84380 | 164.90553 | 140.90560 | 116.90579 |           |
| oxyfluorfen            | 175.37                | 0.04    | Pesticides | C15H11ClF3NO4    | 2196               | 300.00266 | 237.03959 | 252.03884 | 315.99803 | 222.97683 |
| pentachlorobenzene     | 130.33                | 0.18    | Pesticides | C6HCl5           | 1508               | 212.88191 | 177.91234 | 176.90495 | 141.93570 |           |
| pentachlorophenol      | 134.35                | 0.05    | Pesticides | C6HOCl5          | 1741               | 164.90602 | 201.87198 | 227.86958 |           |           |
| permethrin I           | 187.55                | 0.06    | Pesticides | C21H20Cl2O3      | 2687               | 355.10844 | 354.10138 | 319.13202 | 254.04911 | 183.08009 |
| permethrin II          | 187.51                | 0.36    | Pesticides | C21H20Cl2O4      | 2706               | 355.10844 | 354.10138 | 319.13202 | 254.04911 | 183.08009 |
| propethamphos          | 163.12                | 0.53    | Pesticides | C10H20NO4PS      | 1779               | 194.04039 | 138.01370 | 238.02977 | 111.06770 | 165.98475 |
| propham_F              | 127.10                | 0.18    | Pesticides | C7H7NO2          | 1461               | 120.04478 | 93.05804  | 77.03972  |           |           |
| resmethrin             | 184.54                | 0.10    | Pesticides | C22H26O3         | 2410               | 279.17417 | 171.08027 | 143.08027 | 251.14284 | 323.16385 |
| spiromesifen           | 196.08                | 0.38    | Pesticides | C23H30O4         | 2413               | 272.14071 | 254.13043 | 209.13261 | 231.10198 | 186.06784 |
| sulprofos              | 171.60                | 0.18    | Pesticides | C12H19O2PS3      | 2295               | 218.96973 | 156.00603 | 279.98026 | 138.99757 | 96.95136  |
| terbacil_F             | 125.35                | 0.18    | Pesticides | C5H5N2O2Cl       | 1804               | 143.98526 | 118.00624 | 87.99616  |           |           |
| tolyfluanid            | 159.89                | 0.08    | Pesticides | C10H13Cl2FN2O2S2 | 1996               | 237.96529 | 181.07844 | 137.02828 |           |           |
| trans-chlordane_F      | 156.60                | 0.19    | Pesticides | C10H5Cl7         | 2063               | 265.90322 | 300.87251 | 336.84880 | 229.94470 |           |
| α HCH_F                | 123.82                | 0.07    | Pesticides | C6H3Cl3          | 1686               | 145.96846 | 144.96090 | 108.98449 |           |           |

| Compound       | CCS ( $\text{\AA}^2$ ) | RSD (%) | Family     | Formula   | LRI <sub>exp</sub> | F1        | F2        | F3        | F4        | F5       |
|----------------|------------------------|---------|------------|-----------|--------------------|-----------|-----------|-----------|-----------|----------|
| $\beta$ HCH_F  | 123.33                 | 0.11    | Pesticides | C6H3Cl3   | 1735               | 144.96084 | 121.06533 | 108.98458 | 77.03973  |          |
| $\gamma$ HCH_F | 123.49                 | 0.05    | Pesticides | C6H3Cl3   | 1749               | 144.95973 | 108.98338 | 126.99411 |           |          |
| $\delta$ HCH_F | 123.41                 | 0.08    | Pesticides | C6H3Cl3   | 1807               | 144.96022 | 108.98389 | 74.01545  | 108.98338 |          |
| ehdhp          | 189.58                 | 0.13    | OPFRs      | C20H27O4P | 2413               | 251.04711 | 170.07164 | 153.06895 | 233.03620 | 94.04148 |

**Table S3. Compounds showing CCS deviations between both ionic species  $[M+H]^+$  and  $M^{++}$  greater than 2%.**

| Compound            | Formula         | CCS in $[M+H]^+$ ( $\text{\AA}^2$ ) | CCS in $M^{++}$ ( $\text{\AA}^2$ ) | $\Delta$ CCS (%) |
|---------------------|-----------------|-------------------------------------|------------------------------------|------------------|
| tolyfluanid         | C8H7NFSCI2      | 163.11                              | 159.89                             | 2.0              |
| chlorfenson         | C12H8Cl2O3S     | 161.35                              | 158.08                             | 2.1              |
| 2-phenylphenol      | C12H10O         | 133.57                              | 130.74                             | 2.2              |
| permethrin II       | C21H20O3Cl      | 191.71                              | 187.51                             | 2.2              |
| atrazine desethyl   | C6H10ClN5       | 138.64                              | 135.59                             | 2.2              |
| tefluthrin          | C17H14ClF7O2    | 176.40                              | 180.48                             | -2.3             |
| diflufenican        | C19H11F5N2O2    | 188.06                              | 183.86                             | 2.3              |
| propethamphos       | C10H20NO4PS     | 159.32                              | 163.12                             | -2.3             |
| chlorpyrifos methyl | C7H7Cl3NO3PS    | 153.47                              | 157.20                             | -2.4             |
| carfentrazone ethyl | C15H14Cl2F3N3O3 | 179.06                              | 183.89                             | -2.6             |
| cypermethrin IV     | C22H19Cl2NO3    | 200.33                              | 195.00                             | 2.7              |
| cyfluthrin IV       | C22H18Cl2FNO3   | 200.44                              | 195.03                             | 2.8              |
| cyfluthrin II       | C22H18Cl2FNO3   | 200.53                              | 195.07                             | 2.8              |
| triflumizole        | C15H15ClF3N3O   | 174.71                              | 169.73                             | 2.9              |
| chlorfenvinfos      | C12H14Cl3O4P    | 167.00                              | 172.40                             | -3.1             |
| metconazole         | C17H22ClN3O     | 168.67                              | 174.41                             | -3.3             |
| cypermethrin III    | C22H19Cl2NO3    | 199.97                              | 193.55                             | 3.3              |
| cypermethrin II     | C22H19Cl2NO3    | 199.97                              | 193.55                             | 3.3              |
| cyfluthrin III      | C22H18Cl2FNO3   | 200.53                              | 193.45                             | 3.7              |
| vinclozolin         | C12H9Cl2NO3     | 162.10                              | 156.37                             | 3.7              |
| BTBPE               | C14H8Br6O2      | 189.07                              | 182.34                             | 3.7              |
| fenoxy carb         | C17H19NO4       | 179.77                              | 173.21                             | 3.8              |
| aldrin              | C12H8Cl6        | 155.10                              | 161.65                             | -4.1             |
| chinomethionate     | C10H6N2OS2      | 143.66                              | 137.84                             | 4.2              |
| endosulfan ether    | C9H6Cl6O        | 152.53                              | 146.19                             | 4.3              |
| quintocene          | C6Cl6NO2        | 146.24                              | 139.56                             | 4.8              |
| indoxacarb          | C22H17ClF3N3O7  | 203.97                              | 214.92                             | -5.1             |
| endrin              | C12H8Cl6O       | 163.84                              | 155.20                             | 5.6              |
| cyanophos           | C9H10NO3PS      | 154.25                              | 146.07                             | 5.6              |
| chlorothalonil      | C8Cl4N2         | 150.03                              | 140.00                             | 7.2              |
| endosulfan sulfate  | C9H6Cl6O4S      | 170.87                              | 156.41                             | 9.2              |

**Table S4. Screening of multiclass pesticides in river water samples, fruits and vegetable.**

| Sample       | Compound             | Mass error (ppm) |                    |       |       |       |    |      | ΔCCS (%) |
|--------------|----------------------|------------------|--------------------|-------|-------|-------|----|------|----------|
|              |                      | M <sup>+</sup>   | [M+H] <sup>+</sup> | F1    | F2    | F3    | F4 | F5   |          |
| Apple        | fludioxonil          | 3.4              |                    | -5.3* | -4.3  | -3.2  |    |      | -0.49    |
| Apple        | thiabendazole        |                  | 3.3                | -9.1* |       |       |    |      | 1.31     |
| Apple        | mephosfolan          |                  | 3.6                | -8.4* |       |       |    |      | 1.02     |
| Apple        | bromopropylate_F     | 4.6              |                    | -3.0  |       |       |    |      | -0.37    |
| Apple        | fenhexamid           |                  | 2.0                | 0.0   |       |       |    |      | 0.27     |
| Apple        | atrazinedesisopropyl |                  | 4.2                |       |       |       |    |      | -0.77    |
| Apple        | azoxystrobin         |                  | 2.8                |       |       |       |    |      | 0.17     |
| Apple        | bromuconazole I      |                  | 1.5                |       |       |       |    |      | 1.29     |
| Apple        | bromuconazole II     |                  | 1.5                |       |       |       |    |      | 0.74     |
| Apple        | fenaminphos          | 2.8              |                    |       |       |       |    |      | 0.11     |
| Apple        | fenoxycarb           |                  | 2.4                |       |       |       |    |      | 0.57     |
| Apple        | fenoxycarb           |                  | 2.4                |       |       |       |    |      | 0.57     |
| Apple        | isopyrazam           | 1.6              |                    |       |       |       |    |      | 0.21     |
| Carrot       | DDE                  | 4.0              |                    |       |       |       |    |      | 0.26     |
| Carrot       | fludioxonil          | 2.9              |                    |       |       |       |    |      | 0.13     |
| Cauliflower  | fludioxonil          | 2.6              |                    | -4.8  | -4.4  | -7.5* |    |      | -0.34    |
| Cauliflower  | difeconazole_F       | 4.6              |                    | -3.6  |       |       |    |      | -0.12    |
| Cauliflower  | propiconazole        |                  | 2.0                | -7.7* |       |       |    |      | 1.03     |
| Cauliflower  | cyproconazole        |                  | 3.7                |       |       |       |    |      | 0.83     |
| Cauliflower  | cyprodinil           |                  | -1.0               |       |       |       |    |      | 0.44     |
| Cauliflower  | fenarimol            |                  | 5.9*               |       |       |       |    |      | 0.00     |
| Cauliflower  | fenhexamid           |                  | 3.1                |       |       |       |    |      | 0.08     |
| Cauliflower  | thiabendazole        |                  | 7.6*               |       |       |       |    |      | 0.16     |
| Cucumber     | cyprodinil           |                  | 0.3                | -4.3  | -3.2  | -9.1* |    | 6.1* | 0.40     |
| Cucumber     | fludioxonil          | 3.1              |                    | -6.0* | -6.1* | -3.6  |    |      | -0.04    |
| Cucumber     | difeconazole_F       | 4.0              |                    | 1.2   |       |       |    |      | 0.05     |
| Cucumber     | azoxystrobin         |                  | 1.9                |       |       |       |    |      | 0.30     |
| Cucumber     | propiconazole        |                  | 3.2                |       |       |       |    |      | 0.68     |
| Green pepper | azoxystrobin         |                  | 1.4                |       |       |       |    |      | 0.27     |
| Green pepper | cyprodinil           |                  | 0.6                |       |       |       |    |      | 0.13     |
| Green pepper | difeconazole_F       | 3.1              |                    |       |       |       |    |      | -0.75    |
| Green pepper | fludioxonil          | 2.9              |                    |       |       |       |    |      | -0.02    |
| Orange       | fludioxonil          | 3.3              |                    | -8.2* | -6.0* | -7.7* |    |      | 0.11     |
| Red pepper   | cyprodinil           |                  | 0.5                |       |       |       |    |      | 0.72     |
| Red pepper   | fludioxonil          | 2.5              |                    |       |       |       |    |      | 0.02     |
| Tomato       | fludioxonil          | 2.5              |                    | -6.2* | -6.0* | -4.1  |    |      | 0.10     |
| Tomato       | difeconazole_F       | 3.0              |                    | 1.2   | 1.1   |       |    |      | -0.12    |
| Tomato       | propiconazole        |                  | 2.2                | 2.0   | 1.9   |       |    |      | 0.57     |
| Tomato       | azaconazole          |                  | 2.8                | 3.8   |       |       |    |      | 1.00     |
| Tomato       | bromopropylate_F     | 4.6              |                    | -7.7* |       |       |    |      | -0.27    |
| Tomato       | cyanazine            |                  | 0.7                | 0.3   |       |       |    |      | 0.28     |
| Tomato       | diflucian            | 4.1              |                    | -4.4  |       |       |    |      | -0.39    |



| Sample | Compound               | Mass error (ppm) |                    |      |      |      |    |    | $\Delta$ CCS (%) |
|--------|------------------------|------------------|--------------------|------|------|------|----|----|------------------|
|        |                        | M <sup>+</sup>   | [M+H] <sup>+</sup> | F1   | F2   | F3   | F4 | F5 |                  |
| Tomato | metalaxyl              |                  | 1.5                |      | -0.6 |      |    |    | 0.92             |
| Tomato | 44dichlorobenzophenone |                  | -3.9               |      |      |      |    |    | 0.53             |
| Tomato | azoxystrobin           |                  | 3.0                |      |      |      |    |    | 0.01             |
| Tomato | cyproconazole          |                  | 1.3                |      |      |      |    |    | 1.01             |
| Tomato | cyprodinil             |                  | 2.0                |      |      |      |    |    | 0.40             |
| Tomato | DDE                    | 3.3              |                    |      |      |      |    |    | 0.09             |
| Tomato | difenoconazole         |                  | 2.8                |      |      |      |    |    | 1.40             |
| Tomato | EPN                    |                  | 3.8                |      |      |      |    |    | 0.38             |
| Tomato | famphur                |                  | 3.5                |      |      |      |    |    | 0.50             |
| Tomato | fenarimol              |                  | 3.0                |      |      |      |    |    | 0.70             |
| Tomato | fenhexamid             |                  | 2.0                |      |      |      |    |    | 0.29             |
| Tomato | fenpropimorph          |                  | -0.2               |      |      |      |    |    | 0.66             |
| Tomato | isopyrazam             | 2.9              |                    |      |      |      |    |    | 0.16             |
| Tomato | metconazole            |                  | 2.7                |      |      |      |    |    | 1.12             |
| Tomato | tebuconazole           |                  | 2.4                |      |      |      |    |    | 0.81             |
| Tomato | terbutryn              |                  | 1.8                |      |      |      |    |    | 0.89             |
| Tomato | thiabendazole          |                  | 4.3                |      |      |      |    |    | 0.81             |
| Tomato | triadimefon            |                  | 1.6                |      |      |      |    |    | 0.78             |
| RW17   | fludioxonil            | -0.6             |                    | -0.8 | 0.9  | 1.8  |    |    | -0.18            |
| RW17   | propiconazole          |                  | 0.5                | 2.0  | 1.9  |      |    |    | -1.04            |
| RW17   | thiabendazole          |                  | -3.4               | 2.6  | -0.2 |      |    |    | 0.03             |
| RW17   | terbutryn              |                  | -1.6               | -1.5 |      |      |    |    | 0.30             |
| RW17   | diazinon               |                  | 1.8                |      |      |      |    |    | 0.70             |
| RW18   | fludioxonil            | 0.2              |                    | -4.3 | -0.2 | -2.0 |    |    | 0.03             |
| RW18   | terbutryn              |                  | -0.9               | -1.5 |      |      |    |    | 0.13             |
| RW18   | thiabendazole          |                  | -2.8               |      | -0.1 |      |    |    | 0.18             |
| RW18   | diazinon               |                  | -1.4               |      |      |      |    |    | 0.26             |
| RW18   | propiconazole          |                  | 2.2                |      |      |      |    |    | -0.13            |
| RW19   | terbumeton             |                  | -0.4               | -3.1 |      |      |    |    | -0.17            |
| RW19   | terbutryn              |                  | -3.9               | -1.5 |      |      |    |    | 0.39             |
| RW19   | propiconazole          |                  | -0.5               |      |      |      |    |    | 0.20             |
| RW19   | terbuthylazine         |                  | -5.0               |      |      |      |    |    | 0.87             |

\*mass errors above 5 ppm.

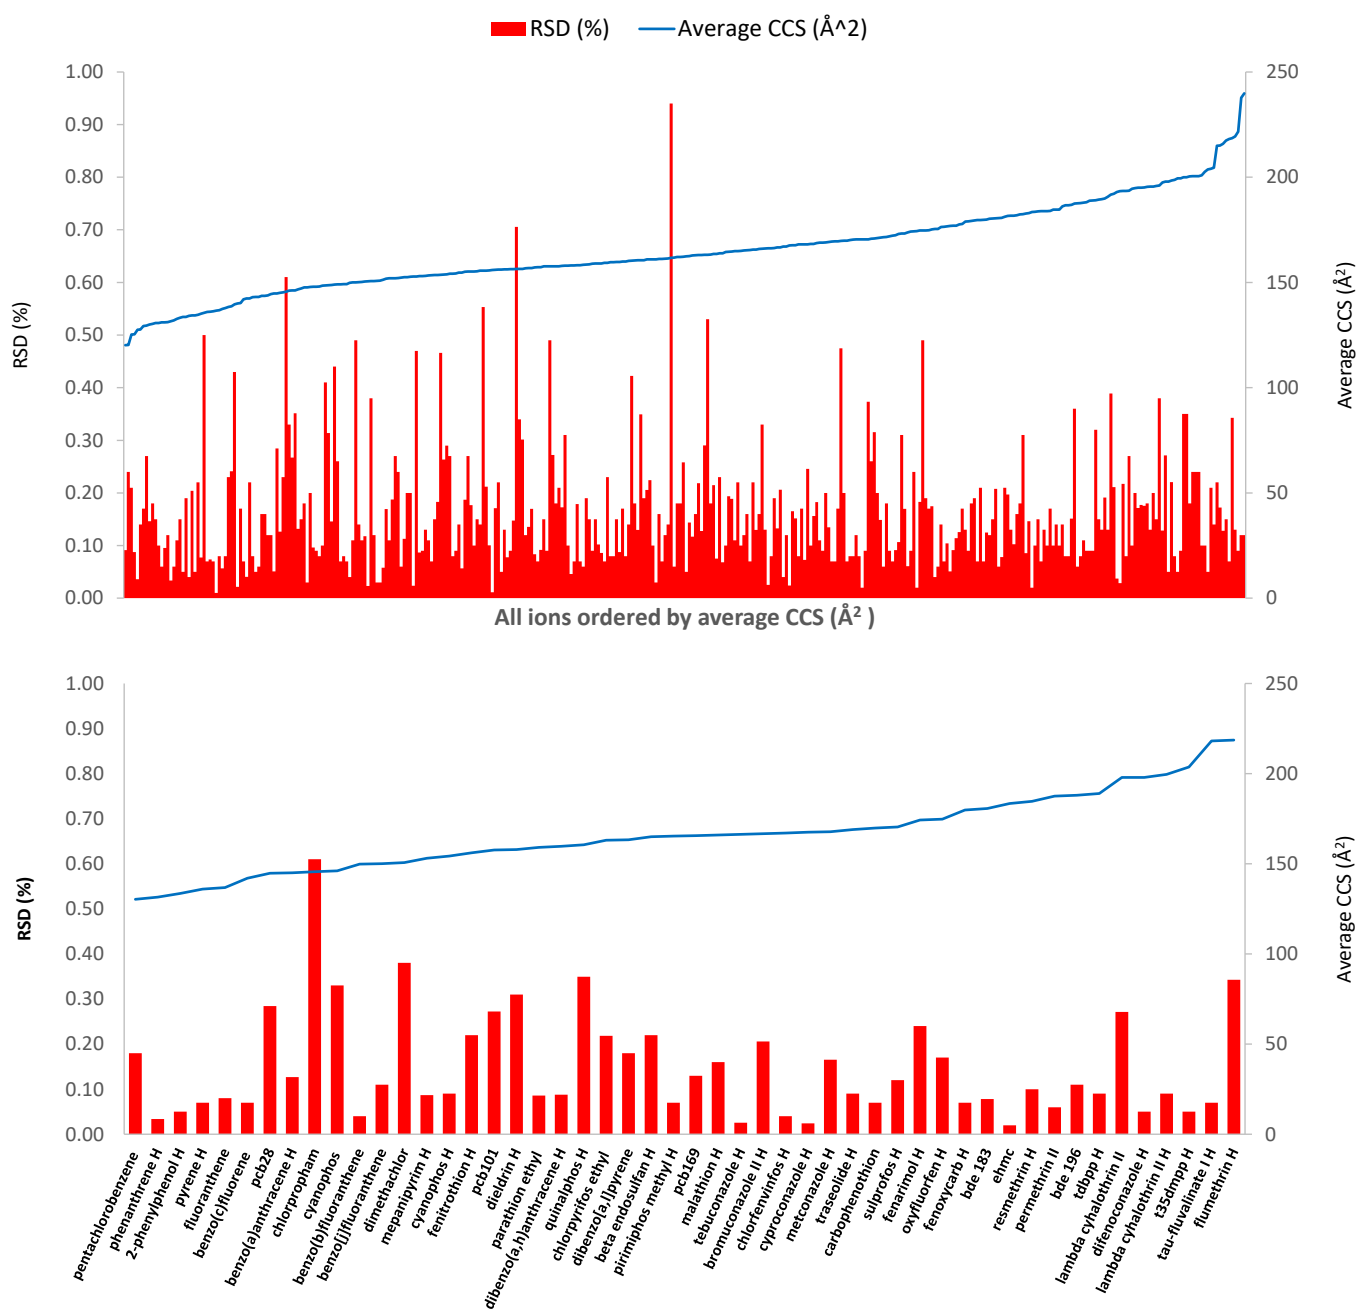

**Figure S1. Average CCS value ( $n=6$ ) and Relative Standard Deviation (RSD) for all ionic species (above) and for 50 randomly selected ion species, the "H" refers to  $[M+H]^+$  whereas the absence of it refers to  $M^+$  (below). In both graphs, ion species are ordered by means of average CCS values on the x-axis.**

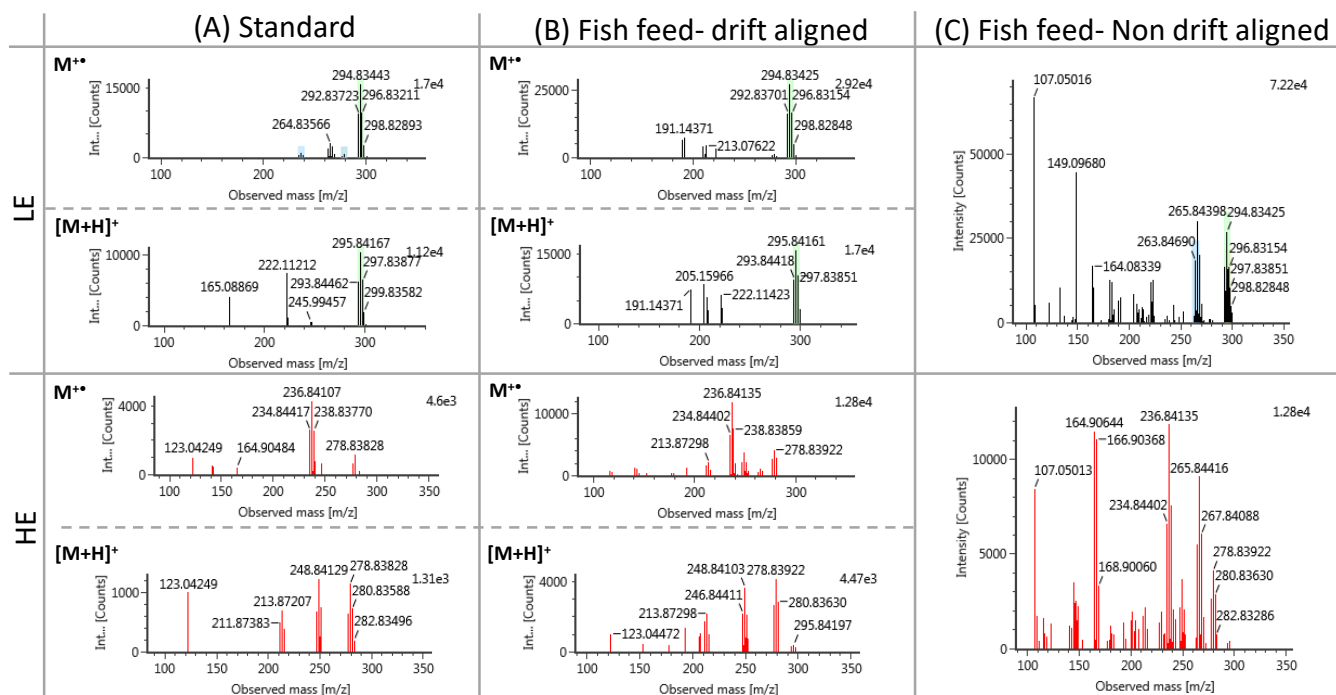

**Figure S2. Comparison of HRMS spectra for quitozene in analytical reference standard solution at  $10 \mu\text{g L}^{-1}$  (A), DT aligned data in fish feed sample spiked at  $10 \mu\text{g L}^{-1}$  (B) and non-DT aligned data of the same finding in the same spiked fish feed sample (C). Low energy (LE) and high energy (HE) spectra are shown for both species  $[\text{M}+\text{H}]^+$  and  $\text{M}^{++}$**

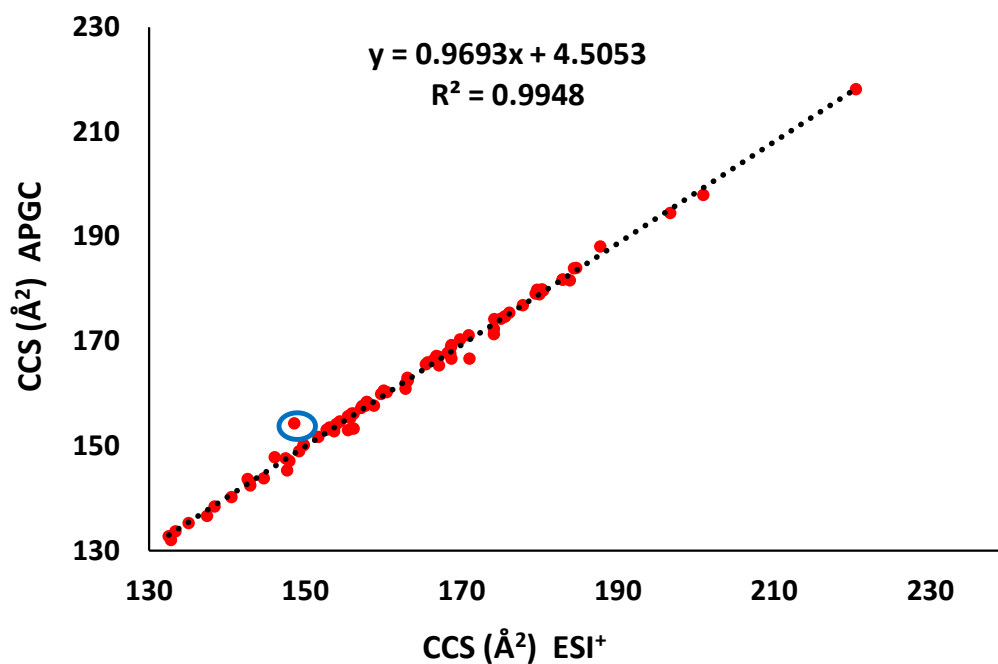

Figure S3. Regression plot of the CCS values for protonated molecules from GC-APCI and LC-ESI. The blue circle surrounds cyanophos.

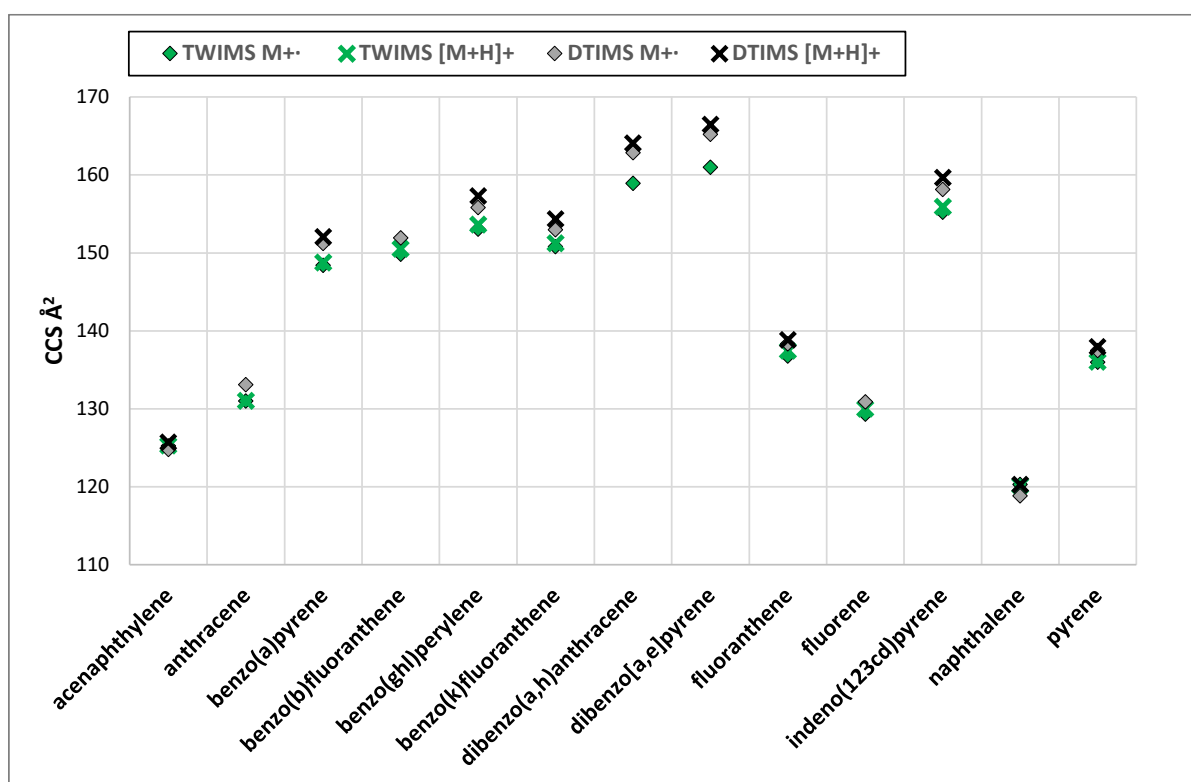

Figure S4. Comparison of CCS values ( $\text{\AA}^2$ ) obtained by different IMS technologies for PAHs.  $CCS^{DTIMS}$  were taken for the work of Zheng et al.<sup>5</sup> and  $CCS^{TWIMS}$  from the library of the current work.

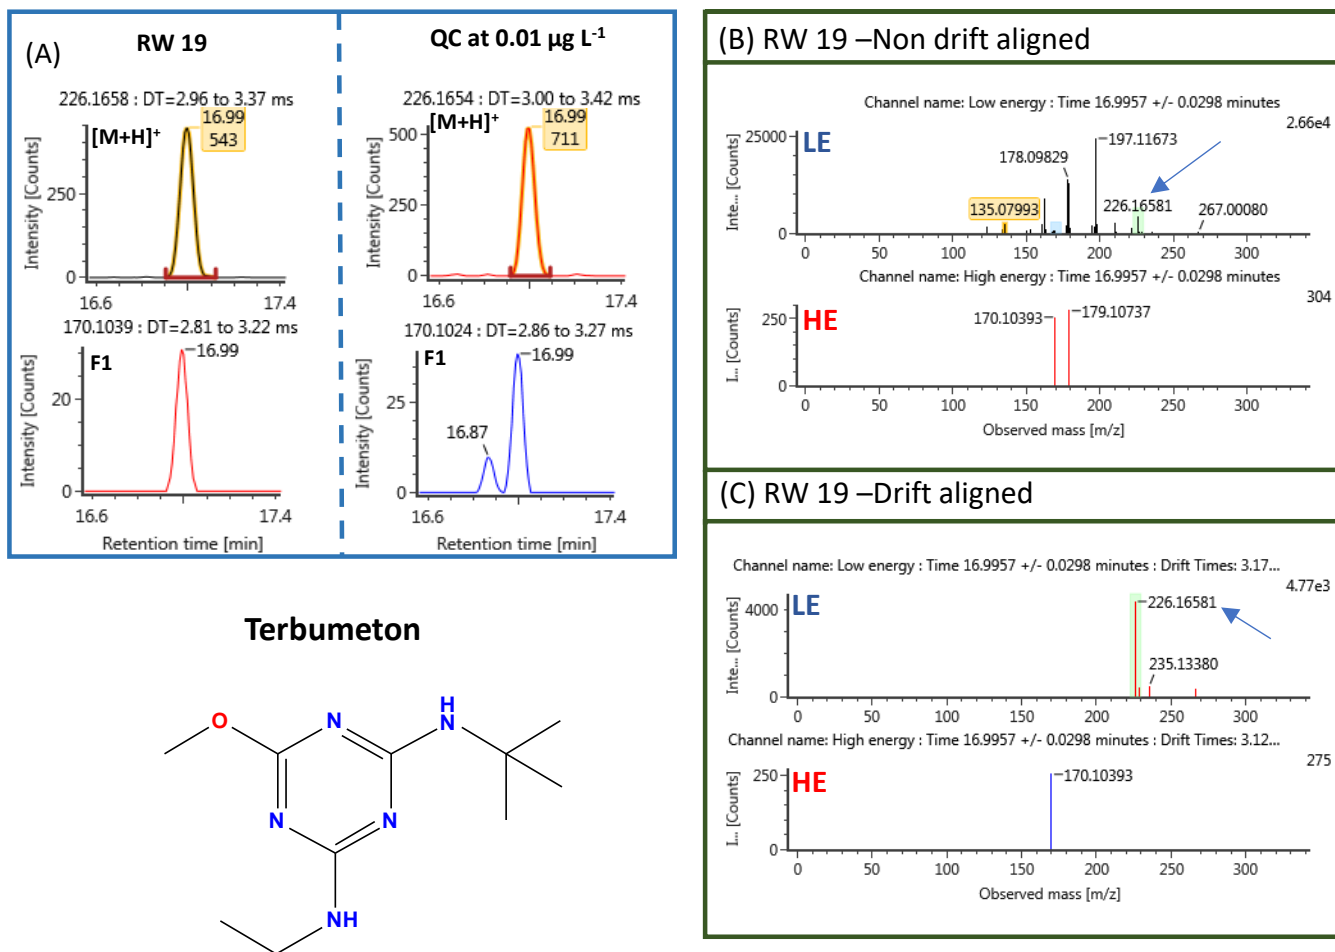

**Figure S5. Identification of terbumeton in surface water. (A) Extracted-ion chromatogram (XIC) (mass window  $\pm$  0.01Da) showing a positive finding in surface water. (B) Conventional LE (top) and HE (bottom) mass spectra without IMS drift time alignment. (C) LE (top) and HE (bottom) mass spectra with IMS drift time alignment.**

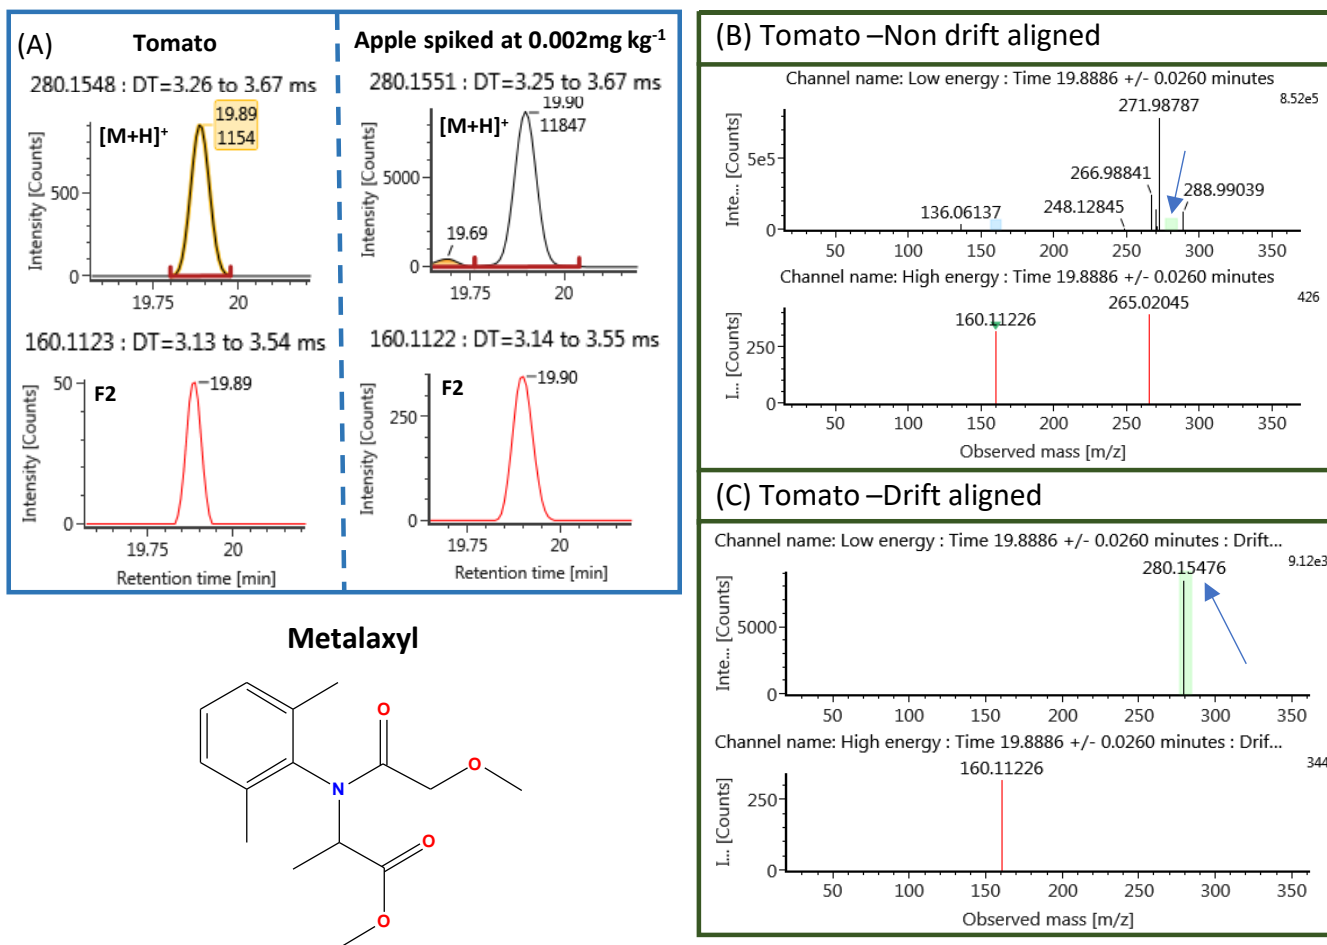

**Figure S6. Identification of metalaxyl in tomato. (A) XIC (mass window  $\pm 0.01\text{Da}$ ) showing a positive finding in tomato. (B) Conventional LE (top) and HE (bottom) mass spectra without IMS drift time alignment. (C) LE (top) and HE (bottom) mass spectra with IMS drift time alignment.**

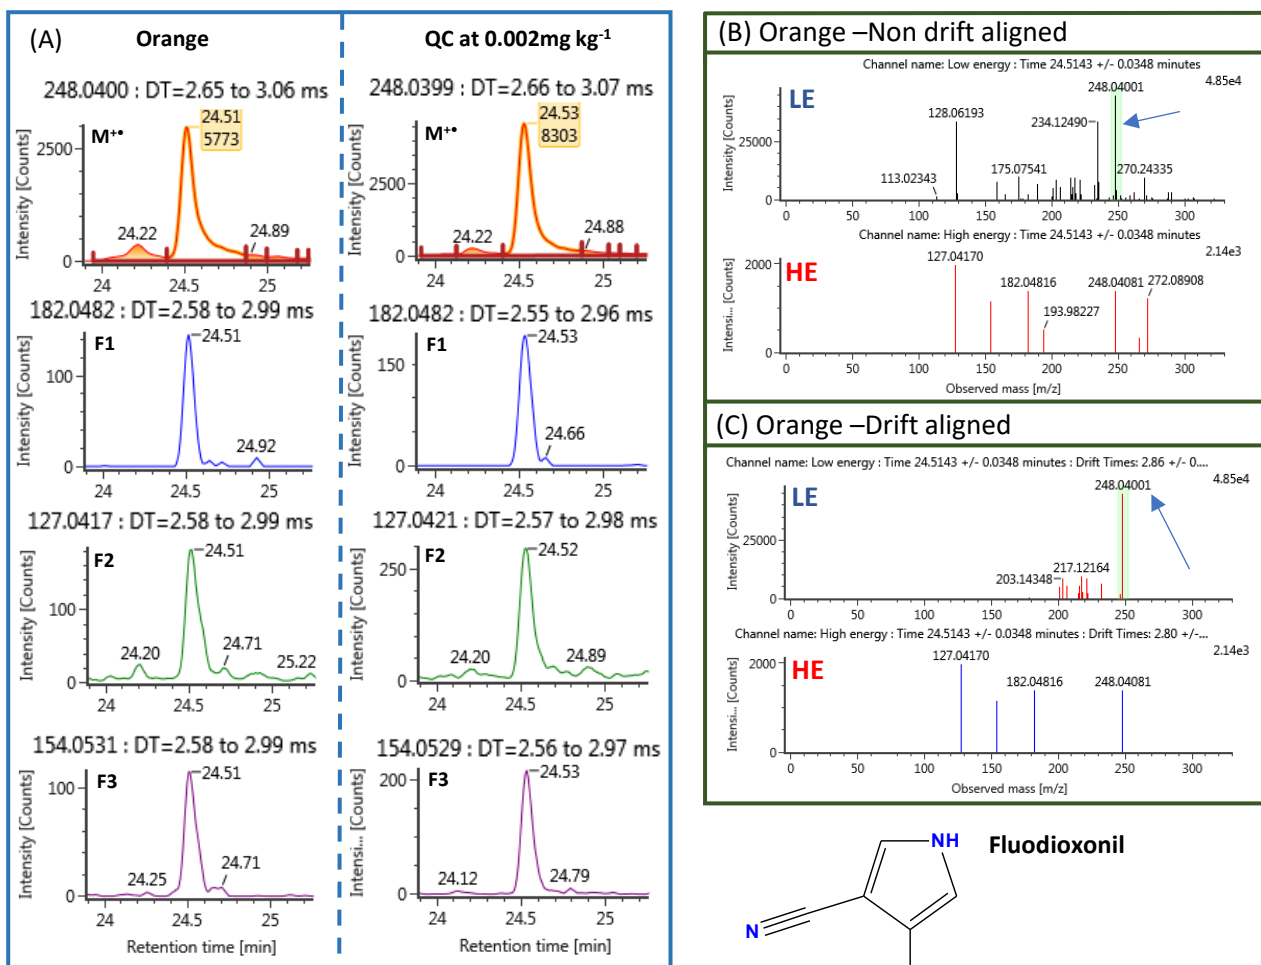

**Figure S7. Identification of fludioxonil in orange. (A) XIC (mass window  $\pm 0.01$ Da) showing a positive finding in orange. (B) Conventional LE (top) and HE (bottom) mass spectra without IMS drift time alignment. (C) LE (top) and HE (bottom) mass spectra with IMS drift time alignment.**

## REFERENCES

- (1) Bijlsma, L.; Pitarch, E.; Hernández, F.; Fonseca, E.; Marín, J. M.; Ibáñez, M.; Portolés, T.; Rico, A. Ecological Risk Assessment of Pesticides in the Mijares River (Eastern Spain) Impacted by Citrus Production Using Wide-Scope Screening and Target Quantitative Analysis. *J. Hazard. Mater.* **2021**, *412*, 125277. <https://doi.org/10.1016/j.jhazmat.2021.125277>.
- (2) Portolés, T.; Garlito, B.; Nácher-Mestre, J.; Berntssen, M. H. G.; Pérez-Sánchez, J. Multi-Class Determination of Undesirables in Aquaculture Samples by Gas Chromatography/Tandem Mass Spectrometry with Atmospheric Pressure Chemical Ionization: A Novel Approach for Polycyclic Aromatic Hydrocarbons. *Talanta* **2017**, *172*, 109–119. <https://doi.org/10.1016/j.talanta.2017.05.025>.
- (3) Portolés, T.; Mol, J. G. J.; Sancho, J. V.; López, F. J.; Hernández, F. Validation of a Qualitative Screening Method for Pesticides in Fruits and Vegetables by Gas Chromatography Quadrupole-Time of Flight Mass Spectrometry with Atmospheric Pressure Chemical Ionization. *Anal. Chim. Acta* **2014**, *838*, 76–85. <https://doi.org/10.1016/j.aca.2014.06.006>.
- (4) European Commission. Guidance Document on the Analytical Quality Control and Method Validation Procedures for Pesticide Residues in Food and Feed. No SANTE/12682/2019. *Eur. Comm. Heal. Consum. Prot. Dir.* **2019**, *12682*, 3–49.
- (5) Zheng, X.; Dupuis, K. T.; Aly, N. A.; Zhou, Y.; Smith, F. B.; Tang, K.; Smith, R. D.; Baker, E. S. Utilizing Ion Mobility Spectrometry and Mass Spectrometry for the Analysis of Polycyclic Aromatic Hydrocarbons, Polychlorinated Biphenyls, Polybrominated Diphenyl Ethers and Their Metabolites. *Anal. Chim. Acta* **2018**, *1037*, 265–273. <https://doi.org/10.1016/j.aca.2018.02.054>.
